# Supplementary material
Source: Springer Nature journal article supplement (https://www.springermedizin.de/resource/supplementary/12876_2010_477_MOESM3_ESM.pdf/9437094)

**A.****Black Swiss F2 mice**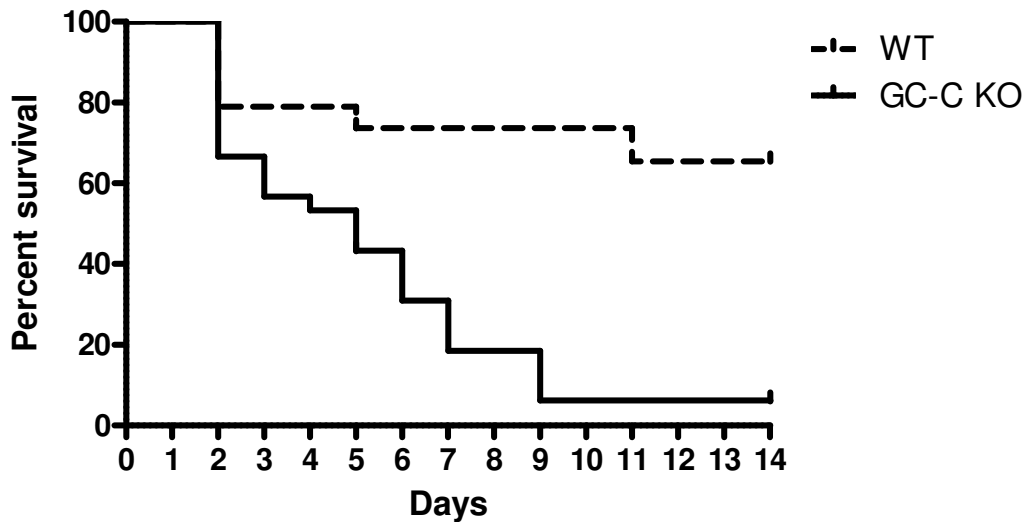**B.****C57BL6/J mice**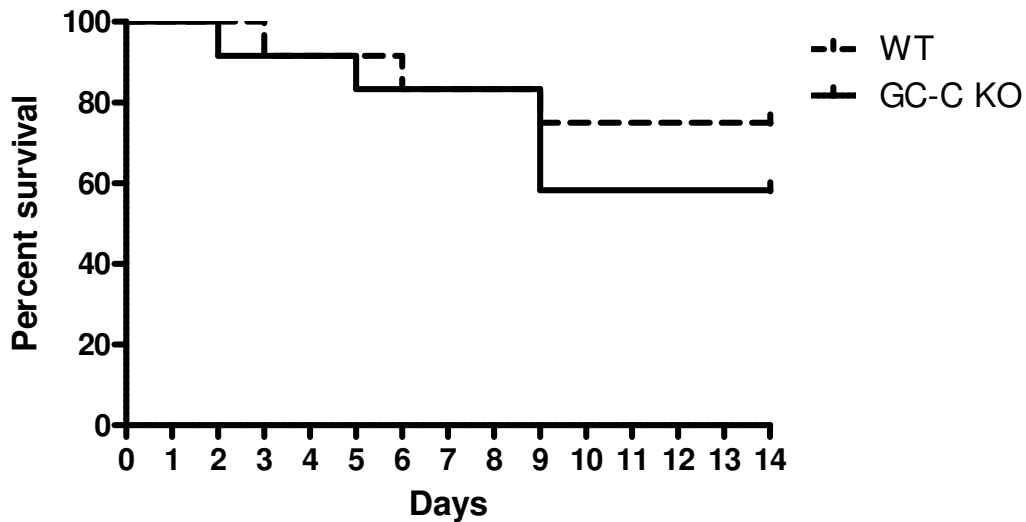

Supplement: MOESM3 [file 9437094]
